# Supplementary material for: Association between HbA1c Levels and Fetal Macrosomia and Large for Gestational Age Babies in Women with Gestational Diabetes Mellitus: A Systematic Review and Meta-Analysis of 17,711 Women
Source: MDPI journal article supplement (doi:10.3390/jcm12113852), 2023-06-05
Supplement: s1 [file s1]

**Supplementary Table S1.** National institute of health (NIH) quality assessment tool for included studies (n=23).

| <b>Author</b>                  | <b>Q1</b> | <b>Q2</b> | <b>Q3</b> | <b>Q4</b> | <b>Q5</b> | <b>Q6</b> | <b>Q7</b> | <b>Q8</b> | <b>Q9</b> | <b>Q10</b> | <b>Q11</b> | <b>Q12</b> | <b>Q13</b> | <b>Q14</b> | <b>Total Score</b> | <b>Comment</b> |
|--------------------------------|-----------|-----------|-----------|-----------|-----------|-----------|-----------|-----------|-----------|------------|------------|------------|------------|------------|--------------------|----------------|
| <i>Alfadhil, 2015</i>          | Y         | Y         | Y         | Y         | Y         | Y         | Y         | Y         | Y         | NR         | Y          | N/A        | N/A        | Y          | 11                 | Good           |
| <i>Antoniou, 2019</i>          | Y         | Y         | Y         | Y         | Y         | Y         | Y         | Y         | Y         | Y          | Y          | N/A        | N/A        | Y          | 11                 | Good           |
| <i>Barquiel, 2016</i>          | Y         | Y         | Y         | Y         | Y         | Y         | Y         | N/A       | Y         | NR         | Y          | N/A        | NA         | Y          | 10                 | Good           |
| <i>Braga, 2018</i>             | Y         | Y         | Y         | Y         | Y         | Y         | Y         | Y         | Y         | NR         | Y          | N/A        | N/A        | Y          | 11                 | Good           |
| <i>Buhary, 2016</i>            | Y         | Y         | Y         | Y         | Y         | Y         | Y         | Y         | Y         | NR         | Y          | N/A        | N/A        | Y          | 11                 | Good           |
| <i>Capula, 2013</i>            | Y         | Y         | Y         | Y         | Y         | Y         | Y         | Y         | Y         | Y          | Y          | Y          | N/A        | Y          | 13                 | Good           |
| <i>Dalfra, 2010</i>            | Y         | Y         | Y         | Y         | Y         | Y         | Y         | Y         | Y         | Y          | Y          | N/A        | N/A        | Y          | 13                 | Good           |
| <i>Gonzalez-Quintero, 2007</i> | Y         | Y         | Y         | Y         | Y         | Y         | Y         | Y         | Y         | NR         | Y          | N/A        | N/A        | Y          | 11                 | Good           |
| <i>Hu, 2019</i>                | Y         | Y         | Y         | Y         | Y         | Y         | Y         | Y         | Y         | NR         | Y          | N/A        | N/A        | Y          | 11                 | Good           |
| <i>Kansu-Celik, 2019</i>       | Y         | Y         | Y         | Y         | Y         | Y         | Y         | Y         | Y         | NR         | Y          | N/A        | N/A        | Y          | 11                 | Good           |
| <i>Katon,</i>                  | Y         | Y         | Y         | Y         | Y         | Y         | Y         | Y         | Y         | NR         | Y          | N/A        | N/A        | Y          | 11                 | Good           |
| <i>Krstevska, 2009</i>         | Y         | Y         | Y         | Y         | Y         | Y         | Y         | Y         | Y         | NR         | Y          | N/A        | N/A        | Y          | 11                 | Good           |
| <i>Liu, 2020</i>               | Y         | Y         | Y         | Y         | Y         | Y         | Y         | Y         | Y         | NR         | Y          | N/A        | N/A        | Y          | 11                 | Good           |
| <i>Mane, 2017</i>              | Y         | Y         | Y         | Y         | Y         | Y         | Y         | Y         | Y         | NR         | Y          | N/A        | N/A        | Y          | 11                 | Good           |
| <i>Mikkelsen, 2011</i>         | Y         | Y         | Y         | Y         | Y         | Y         | Y         | Y         | Y         | Y          | Y          | Y          | N/A        | Y          | 13                 | Good           |
| <i>Olmos, 2012</i>             | Y         | Y         | Y         | Y         | Y         | Y         | Y         | Y         | Y         | Y          | Y          | NA         | NA         | Y          | 12                 | Good           |
| <i>Pintaudi, 2018</i>          | Y         | Y         | Y         | Y         | Y         | Y         | Y         | Y         | Y         | Y          | Y          | N/A        | N/A        | Y          | 12                 | ood            |
| <i>Sweeting, 2017</i>          | Y         | Y         | Y         | Y         | Y         | Y         | Y         | Y         | Y         | NR         | Y          | N/A        | N/A        | Y          | 11                 | Good           |
| <i>Veres, 2015</i>             | Y         | Y         | Y         | Y         | Y         | Y         | Y         | Y         | Y         | NR         | Y          | N/A        | N/A        | Y          | 11                 | Good           |
| <i>Wong, 2017</i>              | Y         | Y         | Y         | Y         | Y         | Y         | Y         | Y         | Y         | Y          | Y          | Y          | N/A        | Y          | 13                 | Good           |
| <i>Chong Xin, 2018</i>         | Y         | Y         | Y         | Y         | Y         | Y         | Y         | Y         | Y         | NR         | Y          | N/A        | N/A        | Y          | 11                 | Good           |
| <i>Xu, 2019</i>                | Y         | Y         | Y         | Y         | Y         | Y         | Y         | Y         | Y         | NR         | Y          | N/A        | N/A        | Y          | 11                 | Good           |
| <i>Zhao, 2019</i>              | Y         | Y         | Y         | Y         | Y         | Y         | Y         | Y         | Y         | NR         | Y          | N/A        | N/A        | Y          | 11                 | Good           |

**Supplementary Table S2.** Search strategy (Medline).

| Search Journals Books Multimedia My Workspace What's New                                                    |         |          |                                 |                        |             |          |
|-------------------------------------------------------------------------------------------------------------|---------|----------|---------------------------------|------------------------|-------------|----------|
| ▼ Search History (21)                                                                                       |         |          |                                 |                        |             |          |
| View Saved                                                                                                  |         |          |                                 |                        |             |          |
| <input type="checkbox"/> # ▲ Searches                                                                       | Results | Type     | Actions                         |                        | Annotations |          |
| <input type="checkbox"/> 1 Gestational diabetes mellitus.mp. or exp Diabetes, Gestational/                  | 19344   | Advanced | <a href="#">Display Results</a> | <a href="#">More ▼</a> |             | Contract |
| <input type="checkbox"/> 2 GDM.mp.                                                                          | 10234   | Advanced | <a href="#">Display Results</a> | <a href="#">More ▼</a> |             |          |
| <input type="checkbox"/> 3 exp Pregnancy/ or Pregnancy diabetes mellitus.mp. or exp Pregnancy in Diabetics/ | 980328  | Advanced | <a href="#">Display Results</a> | <a href="#">More ▼</a> |             |          |
| <input type="checkbox"/> 4 Hyperglycaemia in pregnancy.mp.                                                  | 105     | Advanced | <a href="#">Display Results</a> | <a href="#">More ▼</a> |             |          |
| <input type="checkbox"/> 5 pregnancy induced diabetes.mp.                                                   | 18      | Advanced | <a href="#">Display Results</a> | <a href="#">More ▼</a> |             |          |
| <input type="checkbox"/> 6 Fetal macrosomia.mp. or exp Fetal Macrosomia/                                    | 3590    | Advanced | <a href="#">Display Results</a> | <a href="#">More ▼</a> |             |          |
| <input type="checkbox"/> 7 LGA.mp. or exp Birth Weight/                                                     | 46771   | Advanced | <a href="#">Display Results</a> | <a href="#">More ▼</a> |             |          |
| <input type="checkbox"/> 8 Large for gestational age.mp.                                                    | 3098    | Advanced | <a href="#">Display Results</a> | <a href="#">More ▼</a> |             |          |
| <input type="checkbox"/> 9 Overweight newborn.mp.                                                           | 7       | Advanced | <a href="#">Display Results</a> | <a href="#">More ▼</a> |             |          |
| <input type="checkbox"/> 10 macrosomia.mp.                                                                  | 5687    | Advanced | <a href="#">Display Results</a> | <a href="#">More ▼</a> |             |          |
| <input type="checkbox"/> 11 macrosomia baby.mp.                                                             | 0       | Advanced | <a href="#">Save</a>            | <a href="#">More ▼</a> |             |          |
| <input type="checkbox"/> 12 HbA1c.mp. or exp Glycated Hemoglobin A/                                         | 64932   | Advanced | <a href="#">Display Results</a> | <a href="#">More ▼</a> |             |          |
| <input type="checkbox"/> 13 HaemoglobinA1c.mp.                                                              | 13      | Advanced | <a href="#">Display Results</a> | <a href="#">More ▼</a> |             |          |
| <input type="checkbox"/> 14 HemoglobinA1c.mp.                                                               | 75      | Advanced | <a href="#">Display Results</a> | <a href="#">More ▼</a> |             |          |
| <input type="checkbox"/> 15 Glycated hemoglobin A1c.mp.                                                     | 1257    | Advanced | <a href="#">Display Results</a> | <a href="#">More ▼</a> |             |          |
| <input type="checkbox"/> 16 Glycosylated hemoglobinA1c.mp.                                                  | 8       | Advanced | <a href="#">Display Results</a> | <a href="#">More ▼</a> |             |          |
| <input type="checkbox"/> 17 1 or 2 or 3 or 4 or 5                                                           | 982931  | Advanced | <a href="#">Display Results</a> | <a href="#">More ▼</a> |             |          |
| <input type="checkbox"/> 18 6 or 7 or 8 or 9 or 10 or 11                                                    | 49461   | Advanced | <a href="#">Display Results</a> | <a href="#">More ▼</a> |             |          |
| <input type="checkbox"/> 19 12 or 13 or 14 or 15 or 16                                                      | 65316   | Advanced | <a href="#">Display Results</a> | <a href="#">More ▼</a> |             |          |
| <input type="checkbox"/> 20 17 and 18 and 19                                                                | 602     | Advanced | <a href="#">Display Results</a> | <a href="#">More ▼</a> |             |          |
| <input type="checkbox"/> 21 limit 20 to (english language and humans)                                       | 522     | Advanced | <a href="#">Display Results</a> | <a href="#">More ▼</a> |             |          |
